# Supplementary material for: Intracellular and non-neuronal targets of voltage-gated potassium channel complex antibodies
Source: PubMed Central journal article supplement (PMC5644714; doi:10.1136/jnnp-2016-314758), 2017-01-23
Supplement: jnnp-2016-314758supp001.pdf [file jnnp-2016-314758supp001.pdf]

| <b>Sex, age</b> | <b>VGKC-complex antibodies (pM)</b> | <b>Syndrome classification</b> | <b>Clinical and Investigation features</b>                                                   | <b>Treatments and responses</b>                                                               |
|-----------------|-------------------------------------|--------------------------------|----------------------------------------------------------------------------------------------|-----------------------------------------------------------------------------------------------|
| M, 18           | 141                                 | Encephalopathy                 | Amnesia and seizures with hippocampal T2-high signal                                         | Partial improvement after corticosteroids, IVIG and PLEX                                      |
| M, 61           | 450                                 | Encephalopathy                 | Ataxia, depression and confusion                                                             | Partial response to PLEX                                                                      |
| F, 61           | 808                                 | Encephalopathy                 | Amnesia and seizures with hippocampal T2-high signal                                         | Good response to corticosteroids and PLEX. Antibodies to surface of live hippocampal neurons. |
| M, 17           | 461                                 | Encephalopathy                 | Amnesia, confusion, hypersomnolence. Recurrent bouts.                                        | No immunotherapies, unchanged                                                                 |
| F, 24           | 1378                                | Encephalopathy                 | Coma, amnesia and confusion with CSF lymphocytic pleocytosis. Rapid spontaneous improvement. | No immunotherapy. Complete recovery                                                           |
| M, 70           | 538                                 | Encephalopathy                 | Confusion, tremor and amnesia. Very high doses of sodium valproate.                          | Improvement after corticosteroids and PLEX                                                    |
| M, 29           | 411                                 | Encephalopathy                 | Thyroid eye disease                                                                          | No immunotherapies, mild improvement                                                          |
| M, 70           | 435                                 | Encephalopathy                 | Amnesia, confusion, hallucinations, hypersomnolence                                          | No immunotherapies, unchanged                                                                 |
| M, 40           | 470                                 | Encephalopathy                 | Amnesia, confusion, seizures plus brainstem involvement                                      | Partial recovery without immunotherapies                                                      |
| M, 77           | 470                                 | Encephalopathy                 | Confusion, seizures, amnesia plus myelopathy                                                 | Partial response to corticosteroids and PLEX                                                  |
| F, 49           | 767                                 | Neuromyotonia                  | EMG proven neuromyotonia with mild relapse                                                   | Limited response to AEDs and corticosteroids                                                  |
| M, 61           | 533                                 | Neuromyotonia                  | EMG proven neuromyotonia                                                                     | Limited response to AEDs, corticosteroids and azathioprine                                    |

|       |      |                                 |                                                                   |                                                                     |
|-------|------|---------------------------------|-------------------------------------------------------------------|---------------------------------------------------------------------|
| F, 54 | 801  | Stiff person syndrome           | Auditory and tactile startle.<br>Hypothyroidism.                  | Improvement with corticosteroids and<br>PLEX                        |
| F, 27 | 646  | Stiff person syndrome           | Auditory startle and rigidity                                     | Good response to IVIG                                               |
| F, 70 | 218  | Psychosis                       | Delusions, thought disorder and<br>decline in function            | No change with corticosteroids                                      |
| F, 38 | 334  | Psychosis                       | Delusions, thought disorder and<br>hallucinations                 | No immunotherapy. Mild improvement                                  |
| F, 62 | 1513 | Psychosis                       | Delusions and thought disorder                                    | No change with corticosteroids                                      |
| M, 25 | 1184 | Depression                      | Headaches and attentional deficits                                | No immunotherapies, unchanged                                       |
| M, 37 | 413  | Depression                      | Low mood                                                          | No change with corticosteroids                                      |
| F, 27 | 124  | Depression                      | Also, functional movement disorder                                | No immunotherapy. Mild improvement                                  |
| M, 50 | 610  | Amnesia only                    | Isolated amnesia after fever                                      | Full recovery without immunotherapies                               |
| M, 50 | 448  | Amnesia only                    | Spontaneously resolving amnesia<br>over few weeks                 | No immunotherapy. Complete<br>improvement                           |
| F, 85 | 282  | Parkinson's disease<br>dementia | Headaches and depression with later<br>appearance of tremor       | No immunotherapy. Mild progression                                  |
| M, 83 | 4044 | Guillain-Barre<br>syndrome.     | Demyelinating motor neuropathy.                                   | Marked improvement with IVIG                                        |
| F, 39 | 529  | Neuropathic pain                | Burning pains after idiopathic<br>meningitis                      | No benefit from corticosteroids or IVIG                             |
| M, 21 | 577  | Neuropathic pain                | Burning, lancinating pains and<br>depression                      | Mild improvement with corticosteroids,<br>PLEX and cyclophosphamide |
| F, 26 | 1342 | Neuropathic Pain                | Burning multidermatomal pain; two<br>seizures; raised CSF protein | No response to corticosteroids or IVIG                              |

**Supplementary Table 1. Clinical and paraclinical features of the clinic cohort: 27 patients with VGKC-complex antibodies lacking LGI1 and CASPR2 reactivities.** None had tumors. AEDs = antiepileptic drugs; IVIG = intravenous immunoglobulins; PLEX = plasma exchange.

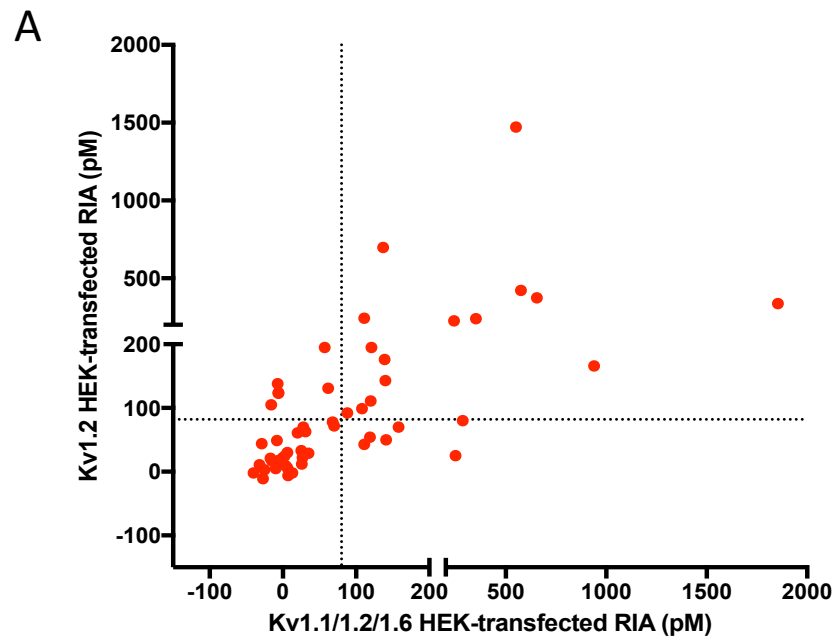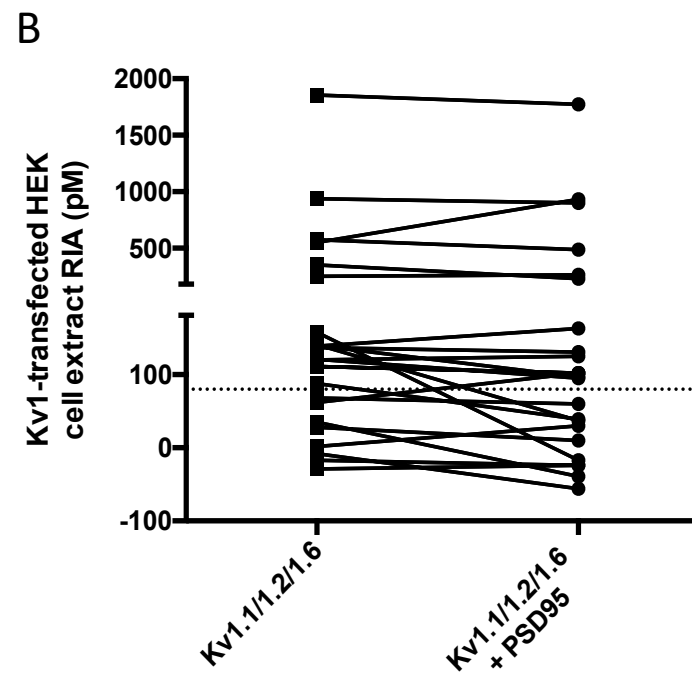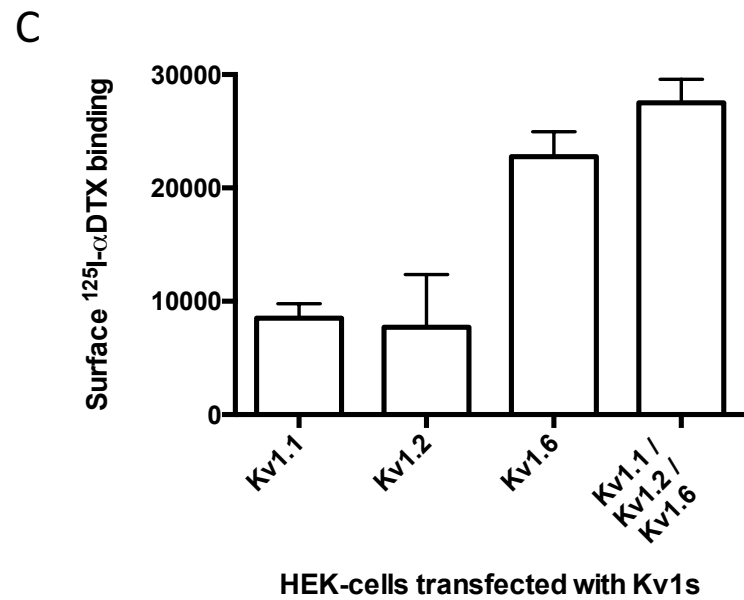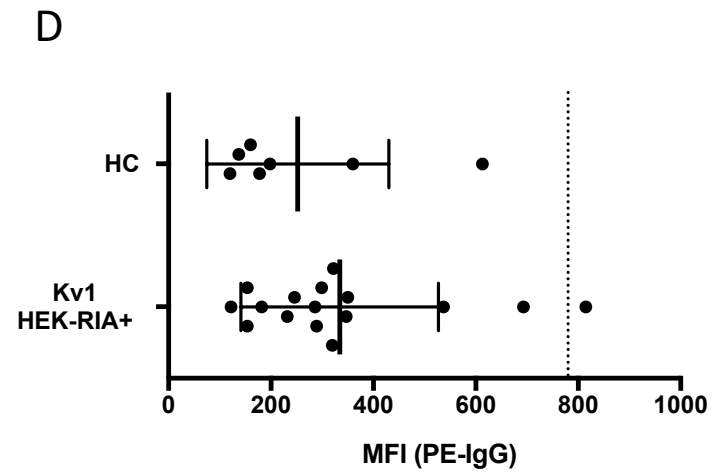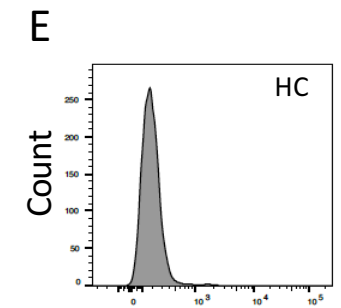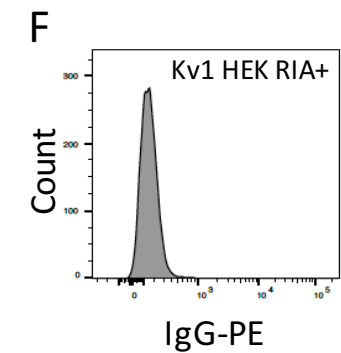

A

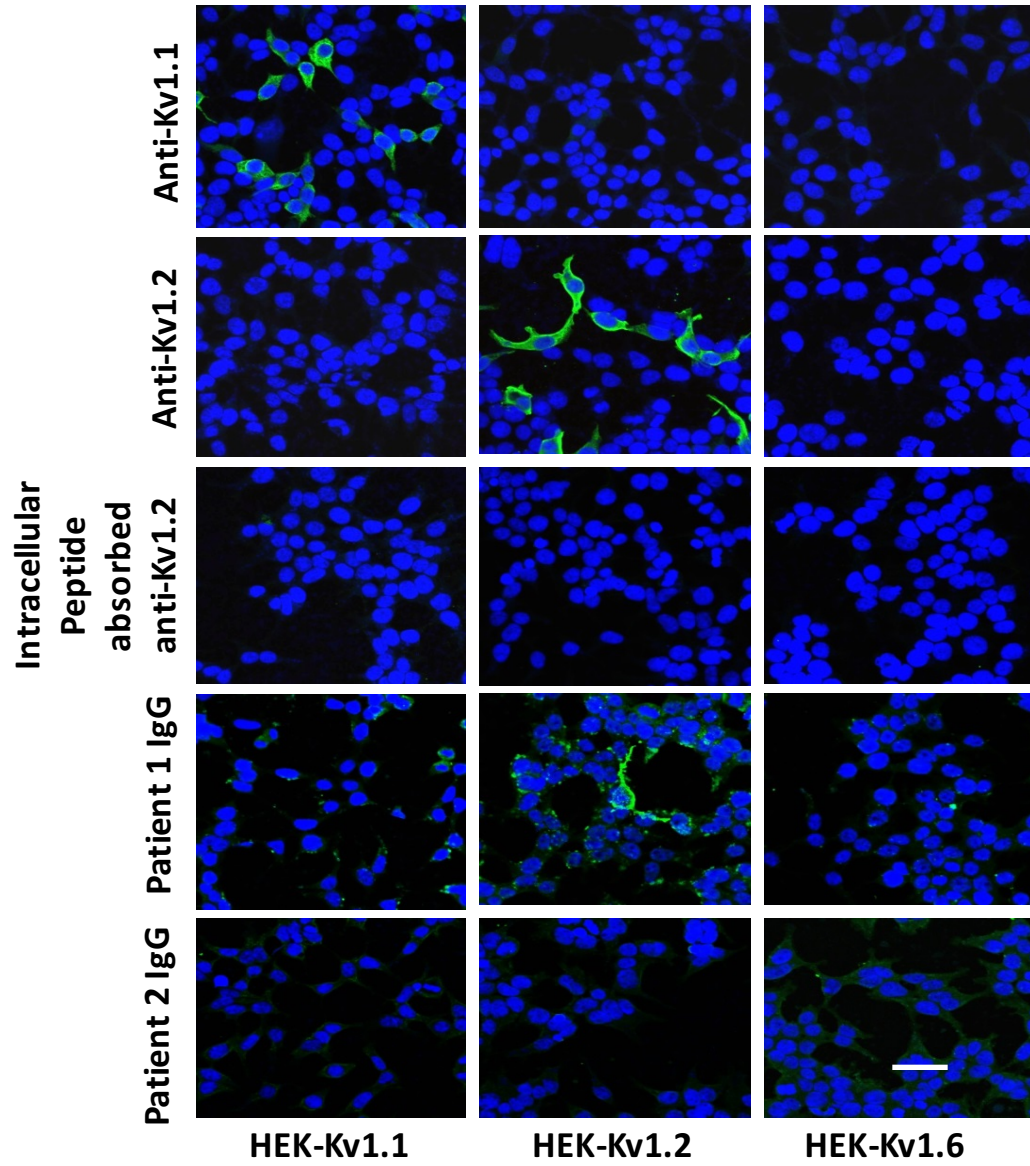

B

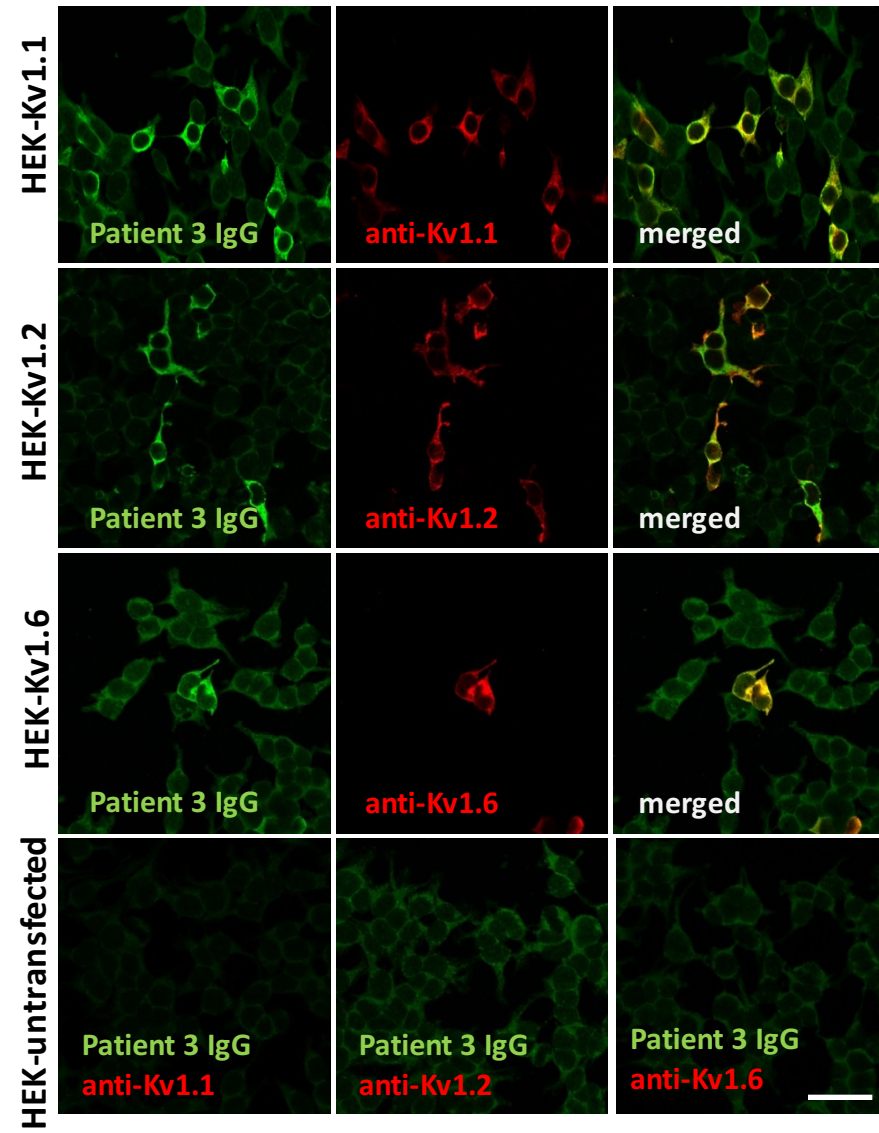

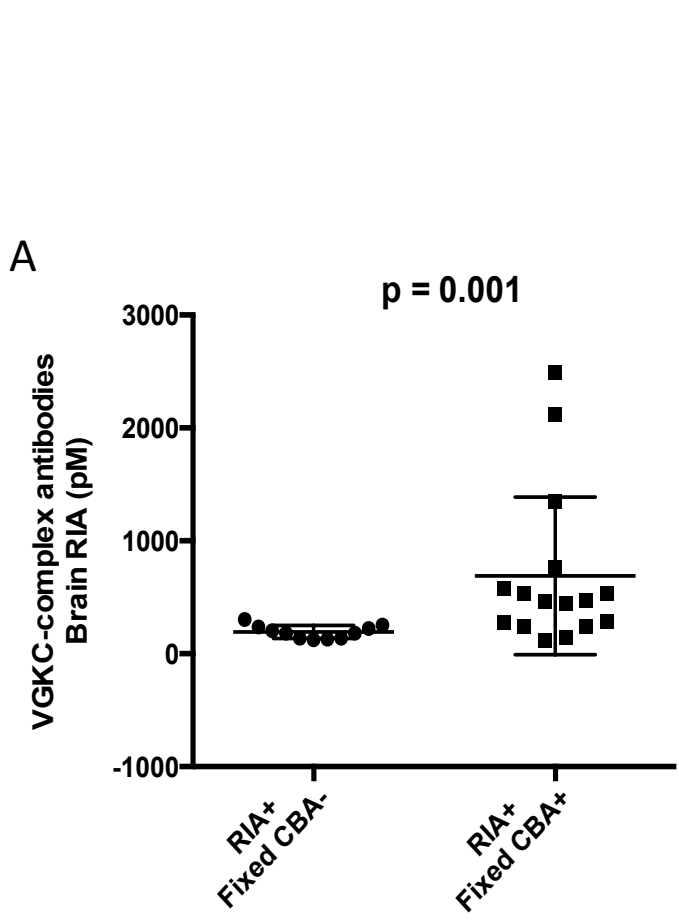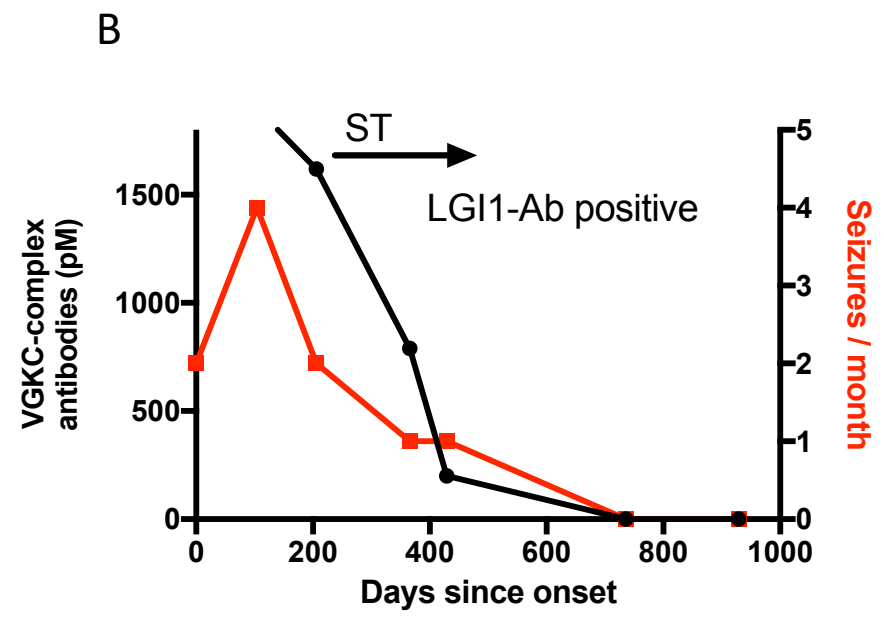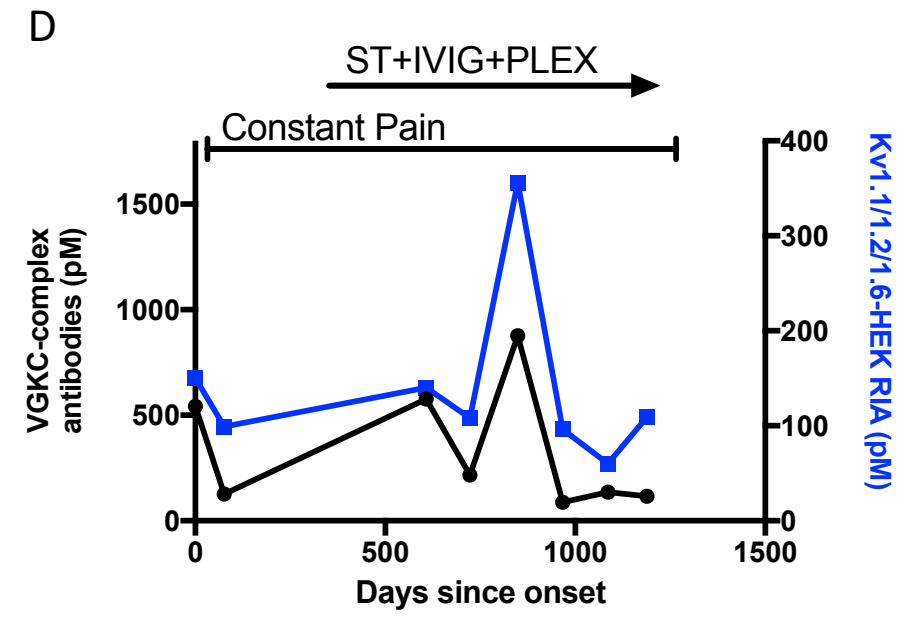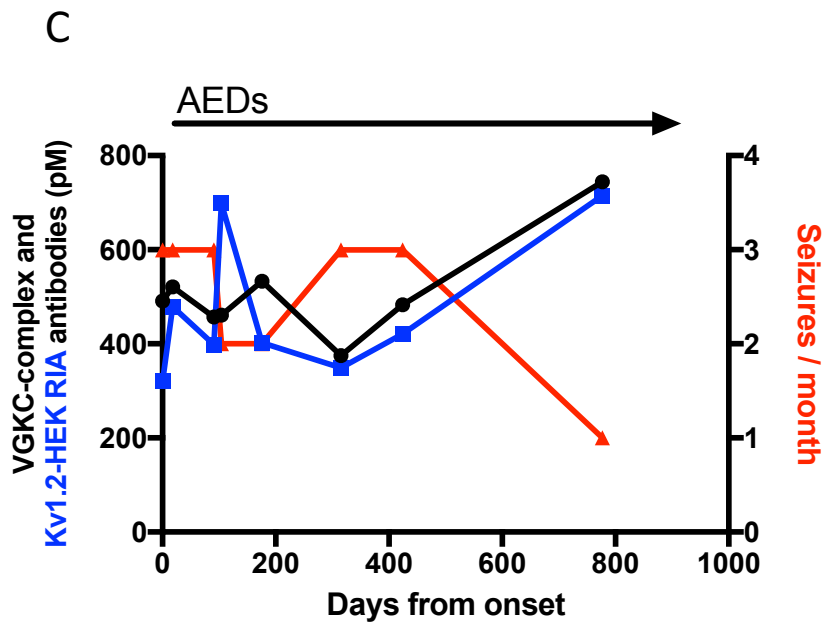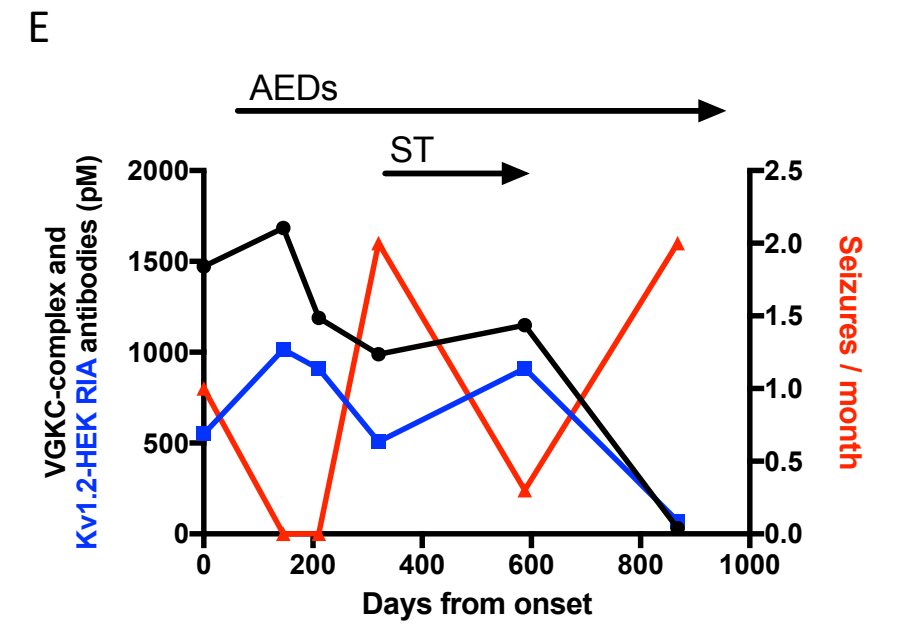

Supplemental Figure 3

### **Supplementary Figure 1. VGKC-complex double-negative antibody epitopes (A)**

Relative precipitations from  $^{125}\text{I}$ - $\alpha\text{DTX}$ -labelled Kv1.1/1.2/1.6-co-transfected HEK-cell extracts and  $^{125}\text{I}$ - $\alpha\text{DTX}$ -labelled Kv1.2-transfected HEK cell extracts showed 15 samples bound both preparations, and an additional 12 bound exclusively one or the other. Mean plus three standard deviations from healthy controls (n=20) generated a cut-off of 80 pM (dotted line); (B) No increase in binding was observed with additional co-transfection of postsynaptic density protein 95 (PSD95); (C) High levels of surface Kv1 expression (determined by  $^{125}\text{I}$ - $\alpha\text{DTX}$ -binding) were observed for Kv1.1-, Kv1.2-, Kv1.6- and Kv1.1/1.2/1.6-co-transfected cells. (D) Using flow cytometry, the 16 samples with the greatest precipitation from  $^{125}\text{I}$ - $\alpha\text{DTX}$ -labelled Kv1.1/1.2/1.6-co-transfected HEK cell extracts (Kv1 HEK RIA+) showed median fluorescent indices (MFI) of IgG binding which were equivalent to those of healthy controls (HC) by live Kv1.1/1.2/1.6-co-transfected HEK cell flow cytometry. The dotted line represents mean plus three standard deviations from HCs. Representative flow-cytometry histograms are shown for a HC (E), and a patient (F) with known Kv1-subunit antibodies in solution (Kv1 HEK RIA+). PE = Phycoerythrin.

**Supplementary Figure 2. Intracellular Kv1 epitopes.** (A) Commercial antibodies against Kv1.1 (anti-Kv1.1) and Kv1.2 (anti-Kv1.2) specifically bind HEK cells transfected with Kv1.1 (HEK-Kv1.1) and Kv1.2 (HEK-Kv1.2) respectively, without cross-reactivity (upper two rows). The binding was lost after the antibodies were absorbed against the immunizing peptide which represented an intracellular sequence of the corresponding Kv1-subunit peptide (data shown for Kv1.2: intracellular peptide absorbed anti-Kv1.2, middle row). Representative examples shown from a patient IgG which only bound the permeabilized Kv1.2-transfected HEK cells (fourth row, Patient 1), and patient IgG which showed no Kv1-subunit reactivity (fifth row, Patient 2). (B) Co-localization of commercial antibody (red, anti-Kv1.1, anti-Kv1.2 and anti-Kv1.6) and patient 3 IgG binding (green) to fixed HEK cells

transfected with Kv1.1 (HEK-Kv1.1), Kv1.2 (HEK-Kv1.2) or Kv1.6 (HEK-Kv1.6). No patient or commercial antibodies bound untransfected HEK cells. Merged images shown in right hand column. Scale bar = 50 microns.

**Supplementary Figure 3. (A)** Kv1-radioimmunoassay – Kv1-fixed CBA comparison. From all samples which were positive in the Kv1-subunit HEK-cell radioimmunoassays (RIA), the VGKC-complex antibody levels were higher in those with positive results by fixed CBA (CBA+; Mann Whitney test,  $p=0.001$ ). Longitudinal seizure frequencies (red), VGKC-complex antibody levels (black) and Kv1.1/1.2/1.6 co-transfected or Kv1.2-transfected HEK-cell radioimmunoassay (RIA) results (blue) are shown (B) for a patient with epilepsy and LGI1-antibodies from Figure 1A, and three patients with intracellular Kv1-antibodies (C-E; cross-referenced with additional clinical details in Table 1). AEDs = antiepileptic drugs; IVIG = intravenous immunoglobulins; PLEX = plasma exchange; ST = corticosteroids.
